# Supplementary material for: High-energy gamma photon engineering of g-C 3 N 4 : low dose rate radiation as a metal-free modification enhancing solar-driven photoactivity
Source: Royal Society of Chemistry journal article supplement (doi:10.1039/d5ta05088j), 2025-01-01
Supplement: d5ta05088j1.pdf [file d5ta05088j1.pdf]

## Supplementary materials

### High-energy gamma photon engineering of g-C<sub>3</sub>N<sub>4</sub>: low dose rate radiation as a metal-free modification enhancing solar-driven photoactivity

Patrycja Wilczewska<sup>1\*</sup>, Karol Szczodrowski<sup>2</sup>, Natalia Górecka<sup>2</sup>, Jacek Ryl<sup>3</sup>, Beata Kalska-Szostko<sup>4</sup>, Inna Soroka<sup>5</sup>, Mats Jonsson<sup>5</sup>, Ewa Maria Siedlecka<sup>1</sup>

#### 1. Reactive oxygen species generation – experimental optimization

The experimental optimization of the conditions for scavenging superoxide anion radicals and hydroxyl radicals was conducted under solar light irradiation. The NBT concentrations used in the process were 0.011 mM, 0.025 mM, 0.038 mM, 0.05 mM, and 0.08 mM. The concentrations range was chosen based on the photocatalyst dose used in the experiments and the reported concentration for g-C<sub>3</sub>N<sub>4</sub> materials in the literature (0.025 mM - 0.075 mM [S1-4]). The results obtained during the experiments are shown in Figure S1a.

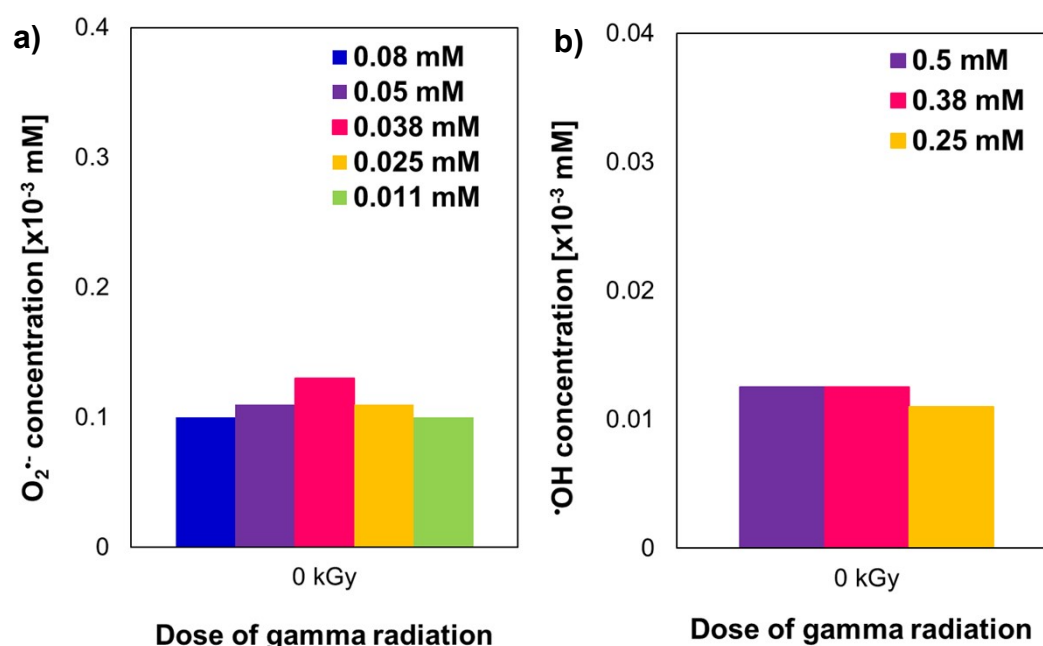

Figure S1. Detection of **a)** superoxide anion radicals and **b)** hydroxyl radicals generated by g-C<sub>3</sub>N<sub>4</sub> samples using NBT and TA, respectively.

Using a 0.038 mM NBT concentration during test, the greatest reduction in NBT concentration after 60 min of solar illumination was observed, corresponding to the highest generation of superoxide anion radicals [S5]. In contrast, higher concentrations, such as 0.05 mM and 0.08 mM, resulted in a smaller decrease in NBT concentration, indicating lower superoxide anion radical production. This effect is likely due to the adsorption of NBT onto the surface of the g-C<sub>3</sub>N<sub>4</sub> samples, which restricts the adsorption and subsequent reduction of oxygen to O<sub>2</sub><sup>•-</sup>. Moreover, NBT adsorbed on the photocatalyst surface can hinder light absorption by g-C<sub>3</sub>N<sub>4</sub>, further suppressing its photocatalytic activity. The optimal NBT concentration was determined to be 0.038 mM, as it enabled the highest detection of superoxide anion radicals, suggesting that inhibitory effects on photocatalytic performance were minimized.

The detection of •OH during solar irradiation of g-C<sub>3</sub>N<sub>4</sub> samples was conducted with TA in 0.25 mM, 0.38 mM, and 0.5 mM (Figure S1b). The TA concentration range reported for probing production of •OH is 0.1 mM – 3 mM [S6-8]. All tested concentrations (0.5 mM, 0.38 mM, and 0.25 mM) indicating comparable •OH concentrations generated by g-C<sub>3</sub>N<sub>4</sub> during illumination. Based on these findings, the 0.38 mM probe concentration was selected as optimal for further experiments, as it ensured sufficient detection sensitivity while minimizing potential probe-induced interferences.

## **2. Mechanism of decomposition of imatinib mesylate (IMA)**

The concentration of the scavengers used was selected to ensure maximum scavenging capacity for the reactive species generated *in situ*, which are involved in the degradation of imatinib. The experiments were conducted on the sample exhibiting the highest photocatalytic activity. The investigated concentration range for the hole scavenger Na<sub>2</sub>EDTA was from 0.04 mM to 15 mM, and the results are presented in Figure S2.

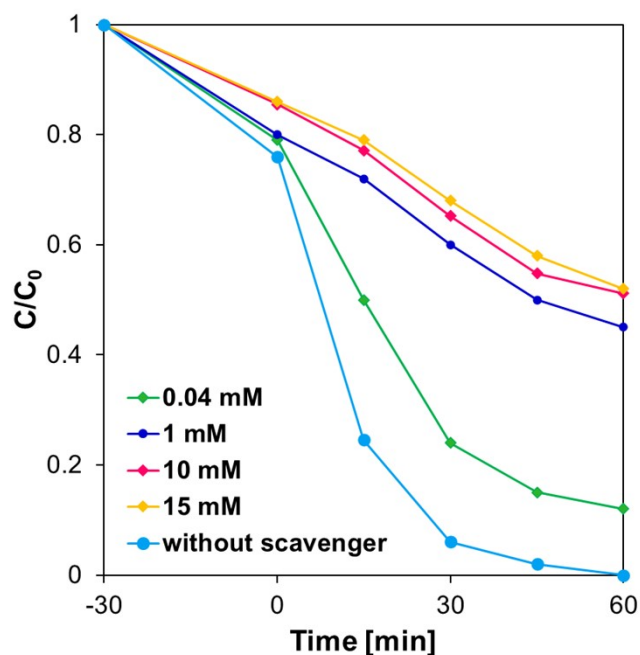

**Figure S2.** Effect of  $\text{Na}_2\text{EDTA}$  concentration as a hole scavenger on the inhibition of IMA degradation under solar light irradiation

In photocatalytic studies involving scavengers, each scavenger is typically used at the same concentration. Due to  $\text{Na}_2\text{EDTA}$  and tert-butyl alcohol concentration used in our experiments was 10 mM. At this concentration tert-butyl alcohol also ensure the maximum scavenging capacity. However, the use of 10 mM ascorbic acid significantly altered the solution's pH, potentially affecting the degradation conditions compared to those without scavengers. To maintain a pH comparable to the initial pH of the IMA solution, the ascorbic acid concentration was reduced to 1 mM. A control experiment was performed using both 1 mM and 10 mM ascorbic acid as scavenger of superoxide anion radical, and no differences in inhibition were observed. Thus, 1 mM ascorbic acid ensures maximum scavenging efficiency while minimizing pH-related interference. The obtained rate constants ( $k_{\text{app}}$ ) for imatinib degradation in the presence of scavengers and the selected  $\text{g-C}_3\text{N}_4$  sample are listed in Table S1.

**Table S1.** Rate constants  $k_{app}$  of IMA degradation in the presence of scavengers under UV-vis and solar light by g-C<sub>3</sub>N<sub>4</sub> irradiated in the dose of 50 kGy

| Type of scavenger         | Type of light                  |                |                |                                |                |                |
|---------------------------|--------------------------------|----------------|----------------|--------------------------------|----------------|----------------|
|                           | UV-vis                         |                |                | Artificial solar light         |                |                |
|                           | $k_{app}$ [min <sup>-1</sup> ] | R <sup>2</sup> | Inhibition [%] | $k_{app}$ [min <sup>-1</sup> ] | R <sup>2</sup> | Inhibition [%] |
| <b>Without scavenger</b>  | 0.359                          | 0.986          | -              | 0.081                          | 0.998          | -              |
| <b>Na<sub>2</sub>EDTA</b> | 0.019                          | 0.991          | 94             | 0.009                          | 0.995          | 89             |
| <b>t-butyl alcohol</b>    | 0.074                          | 0.990          | 79             | 0.046                          | 0.995          | 44             |
| <b>Ascorbic acid</b>      | 0.007                          | 0.993          | 98             | 0.002                          | 0.990          | 98             |

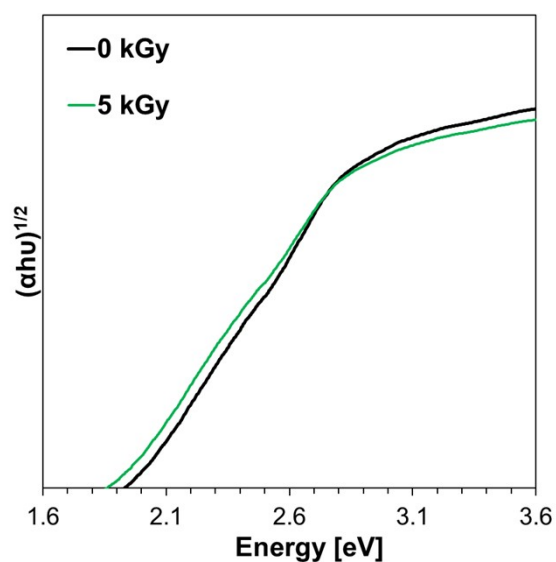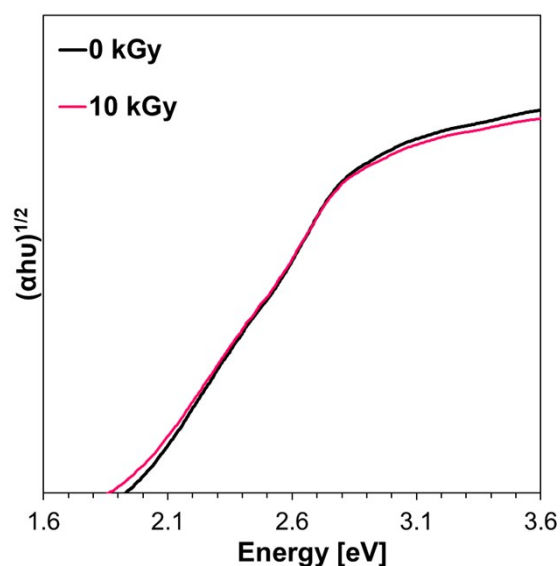

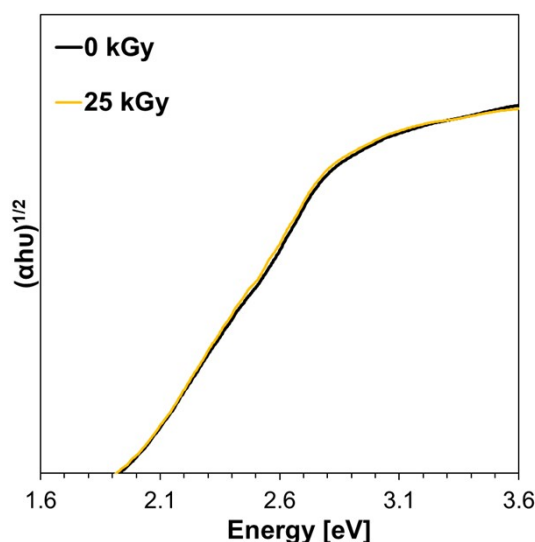

**Figure S3.** Kubelka-Munk transformation for selected gamma irradiated g-C<sub>3</sub>N<sub>4</sub>

#### References:

- [S1] L. Ye, J. Liu, Z. Jiang, T. Peng, L. Zan, Facets coupling of BiOBr-g-C<sub>3</sub>N<sub>4</sub> composite photocatalyst for enhanced visible-light-driven photocatalytic activity, *Appl. Catal. B. Environ.* 142-143 (2013) 1-7. <https://doi.org/10.1016/j.apcatb.2013.04.058>
- [S2] Y. Hong, C. Li, G. Zhang, Y. Meng, B. Yin, Y. Zhao, W. Shi, Efficient and stable Nb<sub>2</sub>O<sub>5</sub> modified g-C<sub>3</sub>N<sub>4</sub> photocatalyst for removal of antibiotic pollutant, *Chem. Eng. J.* 299 (2016) 74-84. <https://doi.org/10.1016/j.cej.2016.04.092>
- [S3] Y. Dang, J. Liu, Y. Huang, M. Ma, K. Liu, X. Dou, Z. Wang, S. Qu, Z. Wang, Engineering the Photocatalytic Behaviors of g/C<sub>3</sub>N<sub>4</sub>-Based Metal-Free Materials for Degradation of a Representative Antibiotic, *Adv. Func. Mat.* 30(31) 2002353 <https://doi.org/10.1002/adfm.202002353>
- [S4] S. Ali, S. Sikadar, S. Basak, M. Mondal, K. Mallick, M.S. Haydar, S. Ghosh, M. N. Roy, Assemble multi-enzyme mimic tandem Mn<sub>3</sub>O<sub>4</sub>@ g-C<sub>3</sub>N<sub>4</sub> for augment ROS elimination and label free detection, *Chem. Eng. J.* 463 (2023) 142355. <https://doi.org/10.1016/j.cej.2023.142355>

- [S5] A. Refaat, M.S. Rahaman, Electrochemical efficacy of a carboxylated multiwalled carbon nanotube filter for the removal of ibuprofen from aqueous solutions under acidic conditions, *Chemosphere* 153 (2016) 508-520. <https://doi.org/10.1016/j.chemosphere.2016.03.078>
- [S6] N. T. Hoang, F. M. Mwazighe, Effect of Operating Conditions on the Yield of 2-Hydroxyterephthalic Acid for Tracing •OH Radical in Electrochemical Process, *Mosc. Univ. Chem. Bull.* 77(5) (2022) 286-299. <https://doi.org/10.3103/s002713142205008x>
- [S7] J. Li, M. Zhang, Q. Li, J. Yang, Enhanced visible light activity on direct contact Z-scheme g-C<sub>3</sub>N<sub>4</sub>-TiO<sub>2</sub> photocatalyst, *Appl. Surf. Sci.* 391 (2017) 184-193. <https://doi.org/10.1016/j.apsusc.2016.06.145>
- [S8] K. Qi, S-y. Liu, R. Selvaraj, W. Wang, Z. Yan, Comparison of Pt and Ag as co-catalyst on g-C<sub>3</sub>N<sub>4</sub> for improving photocatalytic activity: Experimental and DFT studies, *Desalin. Water Treat.* 153 (2019) 244-252. <https://doi.org/10.5004/dwt.2019.24079>
